# Supplementary material for: Relationship between triglyceride glucose index and the incidence of non-alcoholic fatty liver disease in the elderly: a retrospective cohort study in China
Source: PubMed Central journal article supplement — BMJ Open. 2020 Nov 27;10(11):e039804. doi: 10.1136/bmjopen-2020-039804 (PMC7703442; doi:10.1136/bmjopen-2020-039804), 2020-11-27
Supplement: bmjopen-2020-039804supp001.pdf [file bmjopen-2020-039804supp001.pdf]

**Supplementary Table 1** relationship between TyG index and the risk of NAFLD  
excluded subjects with diabetes, CVD and stroke

|                    | TyG index |                    |                     |                    |
|--------------------|-----------|--------------------|---------------------|--------------------|
|                    | n         | unadjusted         | Model 1             | Model 2            |
| As continuous      | 37428     | 1.687(1.589,1.792) | 1.571(1.480,1.668)  | 1.342(1.257,1.433) |
| Quartile 1         | 9536      | Reference          | Reference           | Reference          |
| Quartile 2         | 9368      | 1.036(0.938,1.144) | 1.019 (0.923,1.125) | 0.986(0.887,1.097) |
| Quartile 3         | 9350      | 1.239(1.127,1.362) | 1.209(1.099,1.330)  | 1.076(0.970,1.193) |
| Quartile 4         | 9354      | 1.846(1.691,2.014) | 1.681(1.540,1.836)  | 1.389(1.261,1.530) |
| <i>P</i> for trend |           | <0.001             | <0.001              | <0.001             |

Quartile 1  $\leq$  8.08; 8.09 < Quartile 2  $\leq$  8.40; 8.41 < Quartile 3  $\leq$  8.72; 8.73 < Quartile 4

Model 1: adjusted age and sex;

Model 2: model 1 plus living alone, current smoking, exercise, waist-to-height ratio, systolic blood pressure, diastolic blood pressure, alanine aminotransferase, aspartate aminotransferase, total bilirubin, total cholesterol.
